# Supplementary material
Source: HighWire-hosted journal article supplement (https://www.bmj.com/content/suppl/2008/09/22/337.sep22_1.a1501)
Supplement: vanm564443.ww1.pdf [file vanm564443.ww1.pdf]

**Appendix 1 Reference classification parameters** [posted as supplied by author]

| <b>Table A.</b> Vital signs: normal values according to PRISM III <sup>18</sup> |                              |                           |                       |
|---------------------------------------------------------------------------------|------------------------------|---------------------------|-----------------------|
| <b>Age</b>                                                                      | <b>Respiratory rate /min</b> | <b>Systolic BP (mmHg)</b> | <b>Heart rate/min</b> |
| <1 month                                                                        | 15-90                        | 55-160                    | 80-215                |
| 1-11 months                                                                     |                              | 65-160                    | 60-215                |
| 1-11 year                                                                       | 10-70                        | 75-200                    | 45-185                |
| >12 year                                                                        |                              | 85-200                    | 40-145                |

**heart rhythm:** arrhythmia

**respiration pattern:** inspiratory stridor, respiratory insufficiency

**temperature:**  $\leq 33^{\circ}\text{C}$  or  $\geq 41^{\circ}\text{C}$

**oxygen saturation:** absolute percentage, cut-off =  $< 90\%$

**level of consciousness:** decreased, convulsive at arrival, coma

*Presence of a possible life- threatening condition (PLC):*

Meningitis, sepsis, high-energy trauma, substantial external blood loss or trauma (sharp/blunt) leading to substantial blood loss, aorta dissection,  $\geq 10\%$  dehydration, (near)drowning, electric trauma, apparently life-threatening event (ALTE), possible dangerous intoxication,  $\geq 10\%$  burns, facial burns or possible inhalation trauma, other (specified).

*Diagnostic work-up:*

- **Simple** laboratory tests (CBC, electrolytes, liver enzymes, renal function, urine/stool cultures, nasal swabs)
- **Imaging** (radiograph, ultrasound imaging)
- **Extensive** laboratory tests (blood culture, CSF puncture or combination of two or more laboratory test groups as stated above) or CT/MRI

*Therapy:*

- **Rx:** simple advice, or medication on prescription
- **Rx at the ED:** oral medication at the emergency department (i.e. ORS, prednisone, antibiotics) or small surgical intervention (suture, debridement, bandage)
- **Intervention:** Intravenous medication or intervention at the emergency department (including fluids, aerosols) or surgical intervention (including casting, gastrolavage, inguinal hernia reposition, luxation reposition)
- Other (specified)

*Follow-up:*

- **General practitioner** / telephone contact
- **Outpatient** / emergency department
- **Hospital admission**
