# Supplementary material
Source: HighWire-hosted journal article supplement (https://www.bmj.com/content/suppl/2008/09/22/337.sep22_1.a1501)
Supplement: vanm564443.ww2.pdf [file vanm564443.ww2.pdf]

Table B. Reference classification matrix

|                        | Diagnostics                   |     |                                           |         |           | Therapy |          |              | Follow-up |            |                 |
|------------------------|-------------------------------|-----|-------------------------------------------|---------|-----------|---------|----------|--------------|-----------|------------|-----------------|
|                        | Vital                         | PLC | Simple                                    | Imaging | Extensive | Rx      | Rx at ED | Intervention | Tel./GP   | Outpatient | Hospitalisation |
| <b>1. Immediate</b>    | 1                             | n/a |                                           | n/a     |           |         |          | n/a          |           | n/a        |                 |
| <b>2. Very urgent</b>  | 0                             | 1   |                                           | n/a     |           |         |          | n/a          |           | n/a        |                 |
| <b>3. Urgent</b>       | 0                             | 0   |                                           | n/a     |           | 0       | 0        | 1            |           | n/a        |                 |
|                        | 0                             | 0   |                                           | n/a     |           | 0       | 1        | 0            | n/a       | 0          | 1               |
|                        | 0                             | 0   | 1                                         | 0       | 0         |         |          | n/a          | n/a       | 0          | 1               |
|                        | 0                             | 0   | 0                                         | 1       | 0         |         |          | n/a          | n/a       | 0          | 1               |
|                        | 0                             | 0   | 0                                         | 0       | 1         |         |          | n/a          | n/a       | 0          | 1               |
|                        | 0                             | 0   | 0                                         | 1       | 0         | 1       | 0        | 0            | n/a       | 1          | 0               |
|                        | 0                             | 0   | 0                                         | 0       | 1         | 1       | 0        | 0            | n/a       | 1          | 0               |
|                        | 0                             | 0   | 0                                         | 1       | 0         | 0       | 1        | 0            |           | n/a        |                 |
|                        | 0                             | 0   | 0                                         | 0       | 1         | 0       | 1        | 0            |           | n/a        |                 |
|                        | 0                             | 0   | 0/1                                       | 1       | 1         |         |          | n/a          |           | n/a        |                 |
| <b>4. Standard</b>     | <b>All other combinations</b> |     |                                           |         |           |         |          |              |           |            |                 |
| <b>5. Non-urgent</b>   | 0                             | 0   | 0                                         | 0       | 0         | 0/1     | 0        | 0            | 0         | 0          | 0               |
| 1= present / 0= absent |                               |     | PLC = possible life-threatening condition |         |           |         |          |              |           |            |                 |
| n.a. = not applicable  |                               |     | Rx = medication on prescription           |         |           |         |          |              |           |            |                 |

**Category 1. Immediate :**

Vital parameters: abnormal

**Category 2. Very urgent :**

Possible life-threatening condition: present

**Category 3. Urgent :**

One of the following combinations:

- intervention at the emergency department, diagnostic work-up and follow-up not of application
- extended laboratory diagnostics AND X-ray/ultrasound imaging, intervention
- extended laboratory diagnostics or X-ray/ultrasound imaging AND oral medication or small surgical intervention at the emergency department. Extended laboratory diagnostics or X-ray/ultrasound imaging AND medication on prescription, AND outpatient/emergency department follow-up within 24 hours
- hospital admission AND some diagnostic work-up, Rx at emergency department, or intervention

**Category 4. Standard:**

All patients that were not classified as urgent or non-urgent.

**Category 5. Non-urgent:**

Diagnostic work-up: none

Therapy: none/medication on prescription

Follow-up: none
